# Supplementary material for: Neural Networks in the Design of Molecules with Affinity to Selected Protein Domains
Source: MDPI journal article supplement (doi:10.3390/ijms24021762), 2023-01-16
Supplement: s1 [file s1]

## Figures

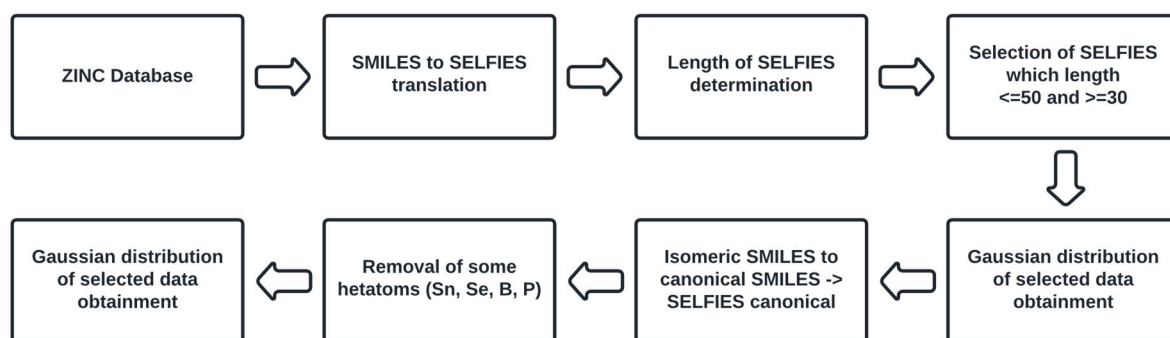

**Figure S1.** Data for model training preparation.

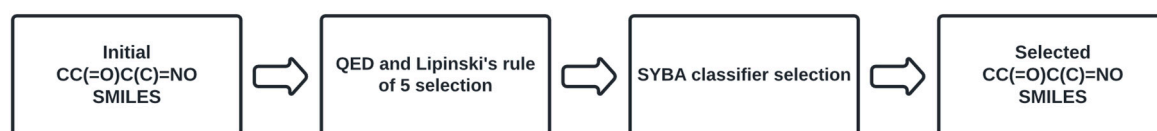

**Figure S2.** Initializer selection workflow.

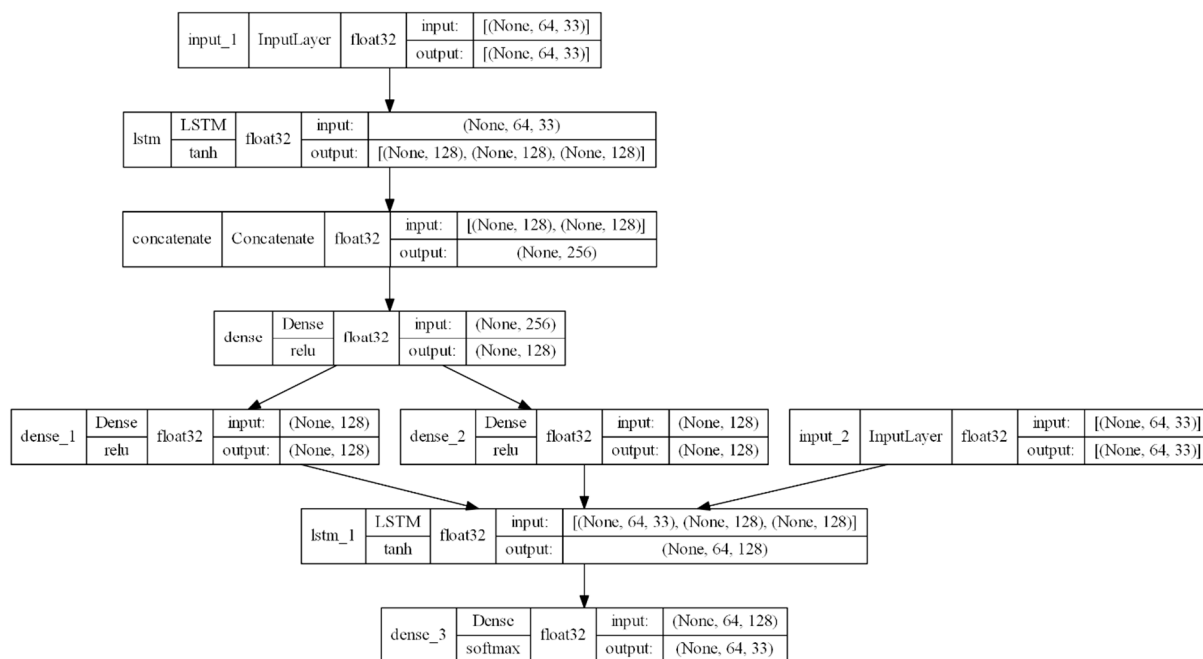

**Figure S3.** The seq\_to\_seq model architecture.

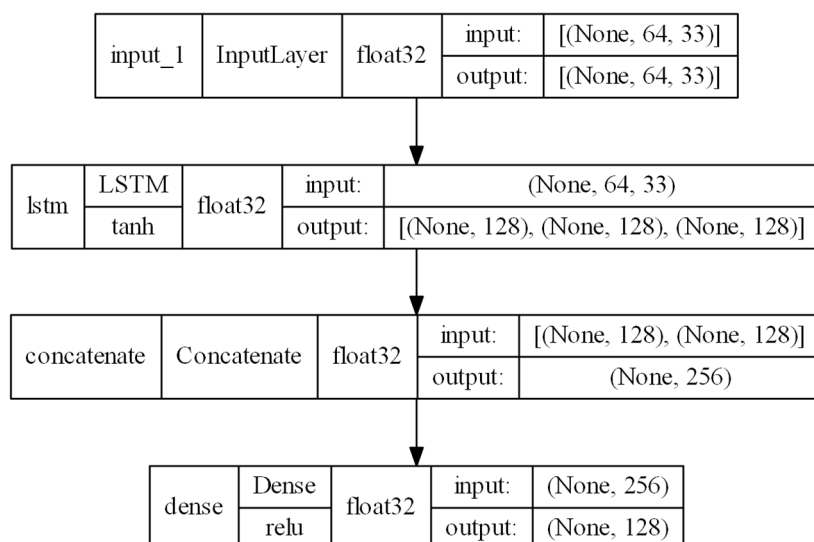

**Figure S4.** Part of the model that encodes molecular sequences into latent space (see **File S16**).

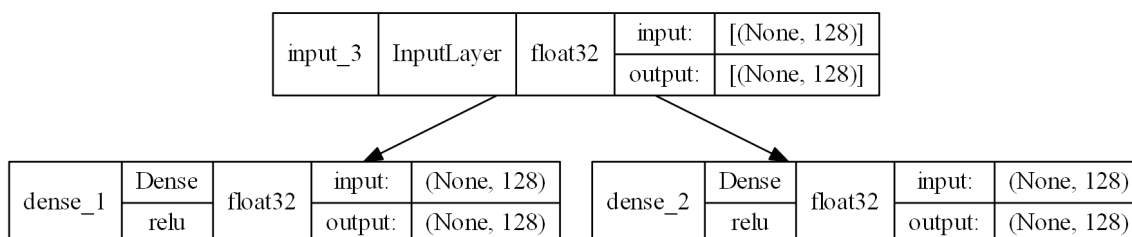

**Figure S5.** The latent to states model takes the tensor of a given dimension and as a result, states are decoded (see **File S17**).

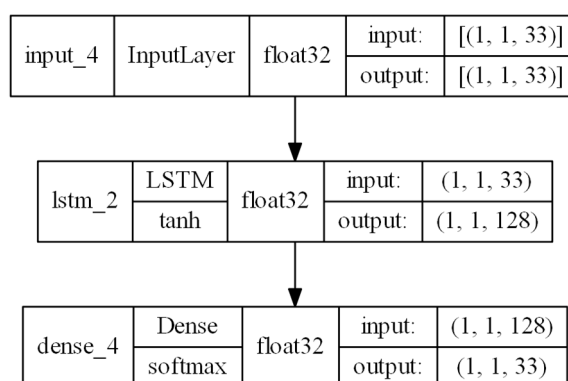

**Figure S6.** The sample model is used to make predictions, character by character (see **File S18**).

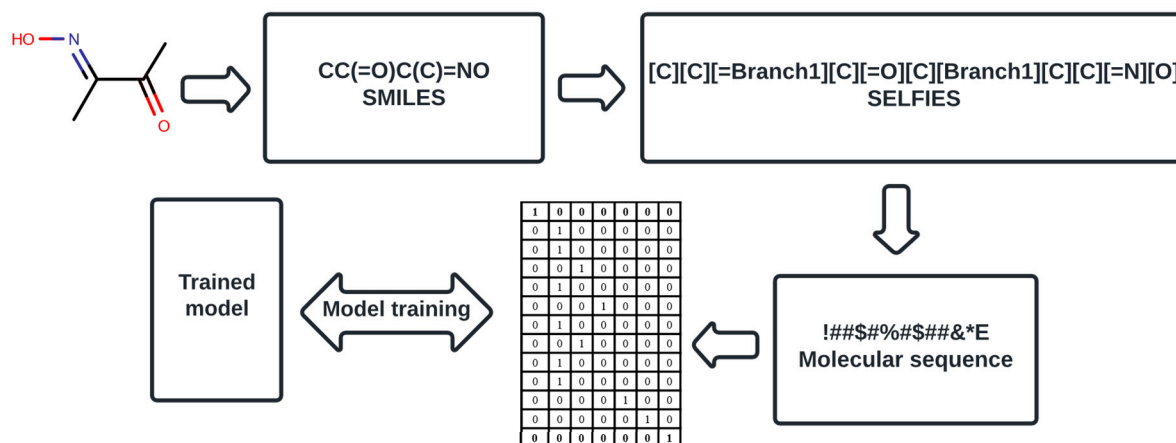

Figure S7. The overall training workflow.

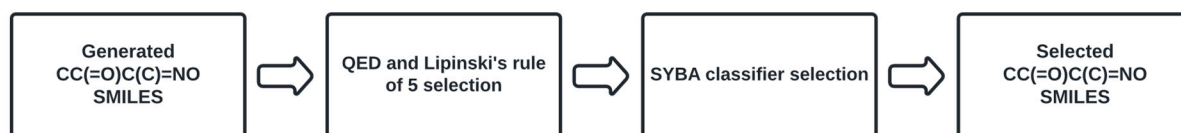

Figure S8. Selection of generated structures workflow.

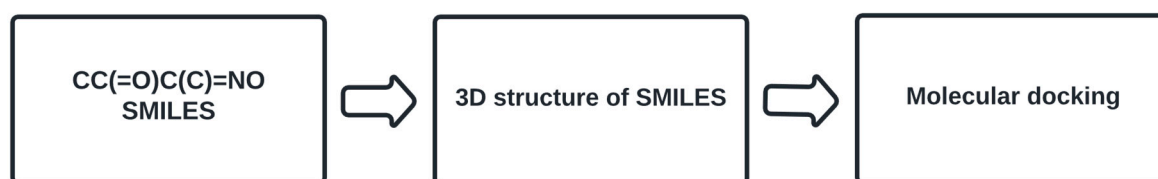

Figure S9. Workflow for molecular docking.

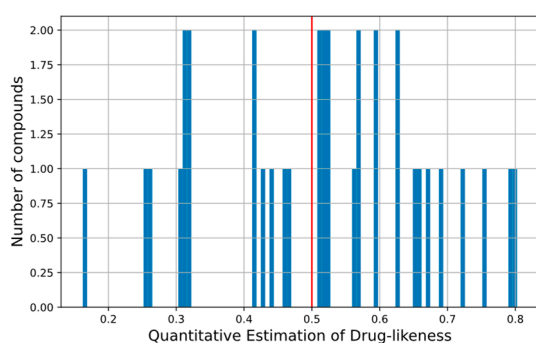

Figure S10. The QED distribution histogram for ROR-γ active compounds with a marked threshold (red vertical line).

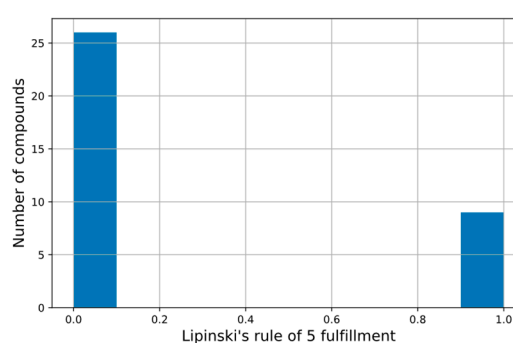

Figure S11. Histogram of Lipinski's rule of 5 fulfillment distribution for ROR-γ active compounds.

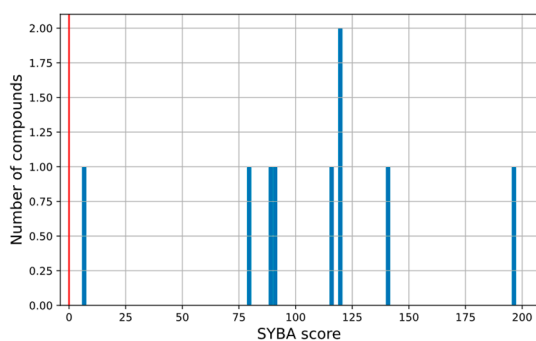

**Figure S12.** The SYBA score distribution histogram for ROR- $\gamma$  active with a marked threshold (red vertical line).

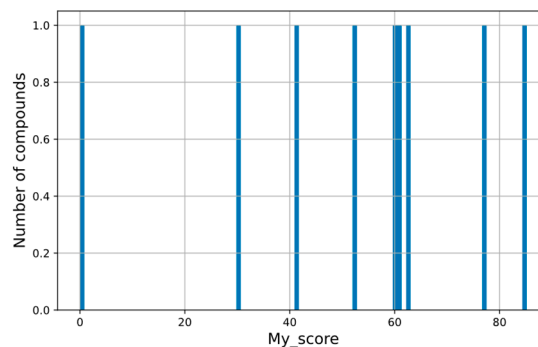

**Figure S13.** My score distribution to 9 structures that passed through three filters.

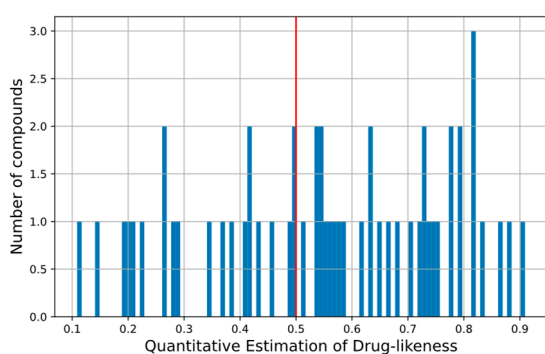

**Figure S14.** The QED distribution histogram for the first prediction with a marked threshold (red line).

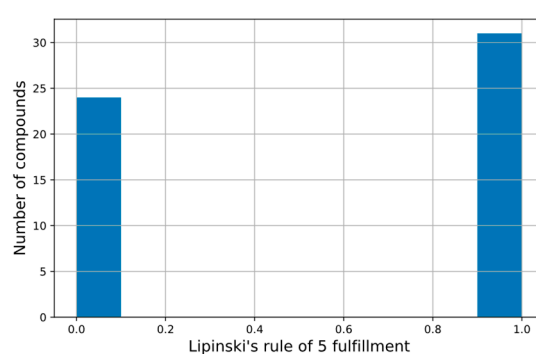

**Figure S15.** Histogram of Lipinski's rule of 5 fulfillment distribution for the first prediction.

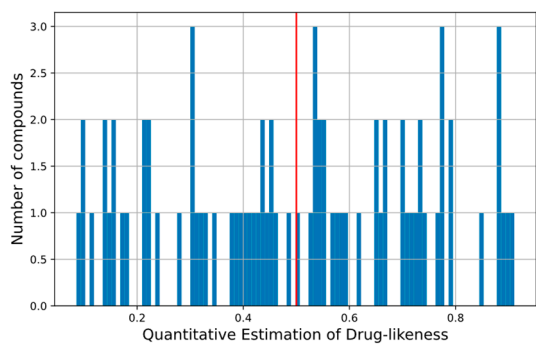

**Figure S16.** The QED distribution histogram for the second prediction with a marked threshold (red vertical line).

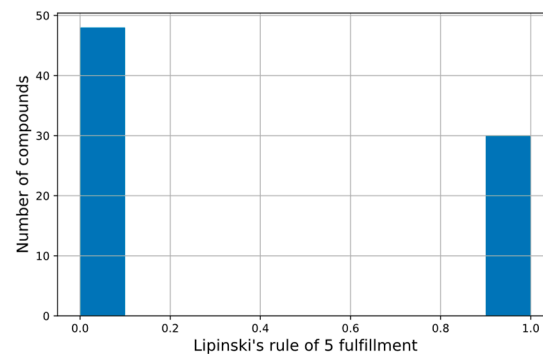

**Figure S17.** Histogram of Lipinski's rule of 5 fulfillment distribution for the second prediction.

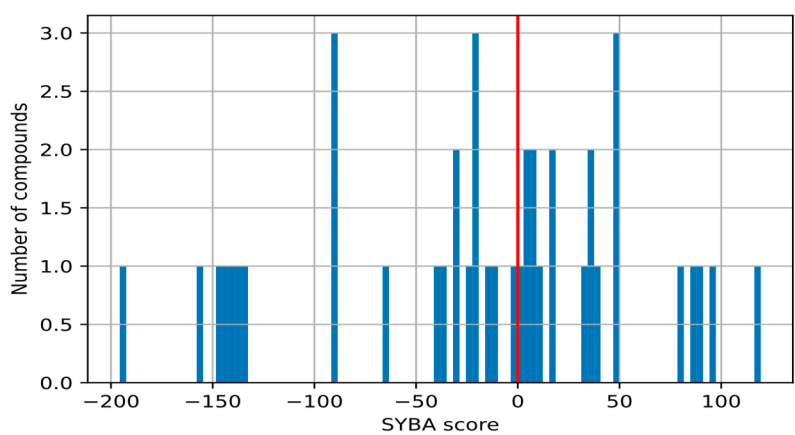

**Figure S18.** The SYBA score distribution over forty-two selected structures with a marked threshold (red vertical line).

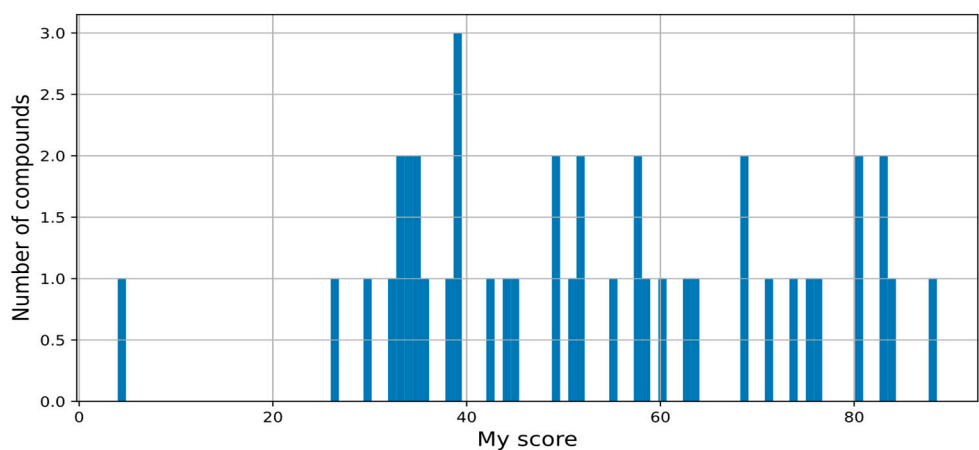

**Figure S19.** My score distribution for File S29. – all generated SMILES (forty-two structures).

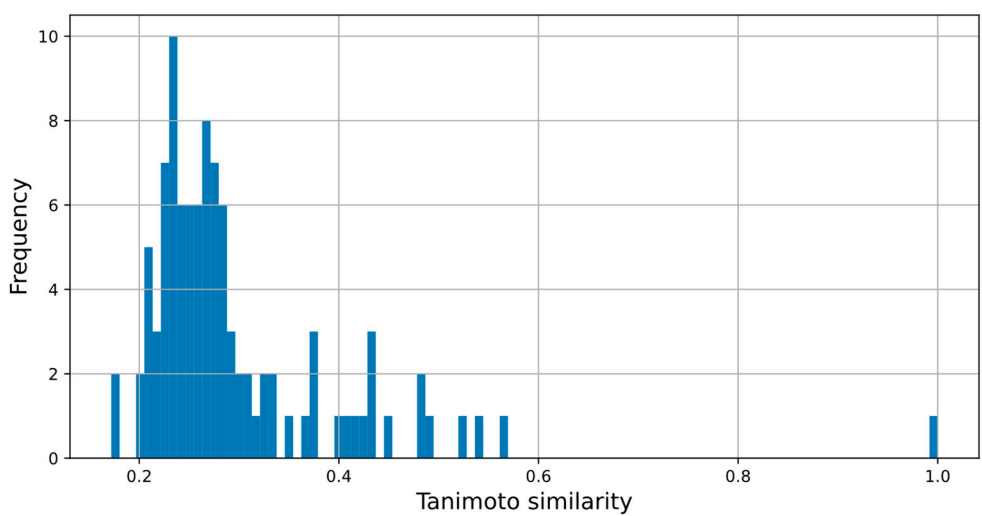

**Figure S20.** The Tanimoto similarity distribution along with twenty generated structures after selection (see Table 1.) and five initials.

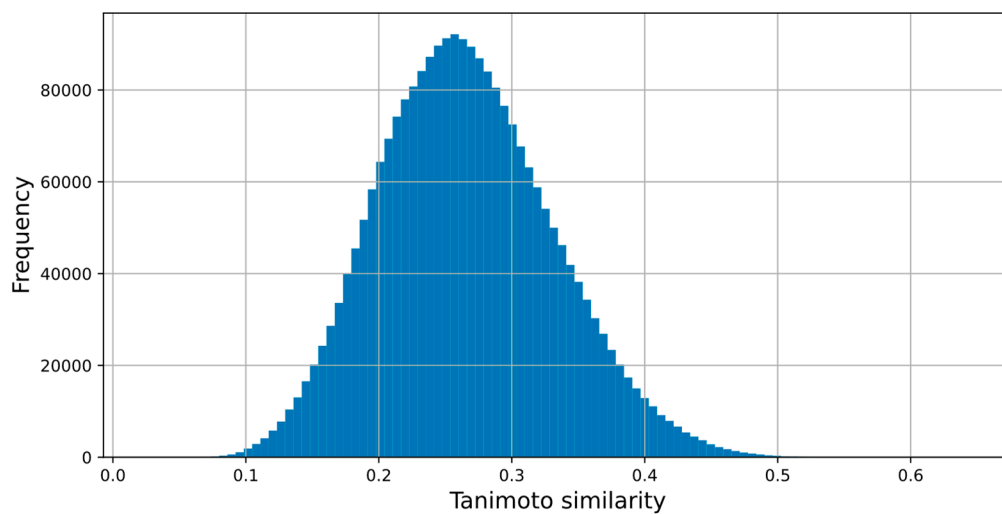

**Figure S21.** The Tanimoto similarity distribution histogram between “to be docked” molecules and the training data.

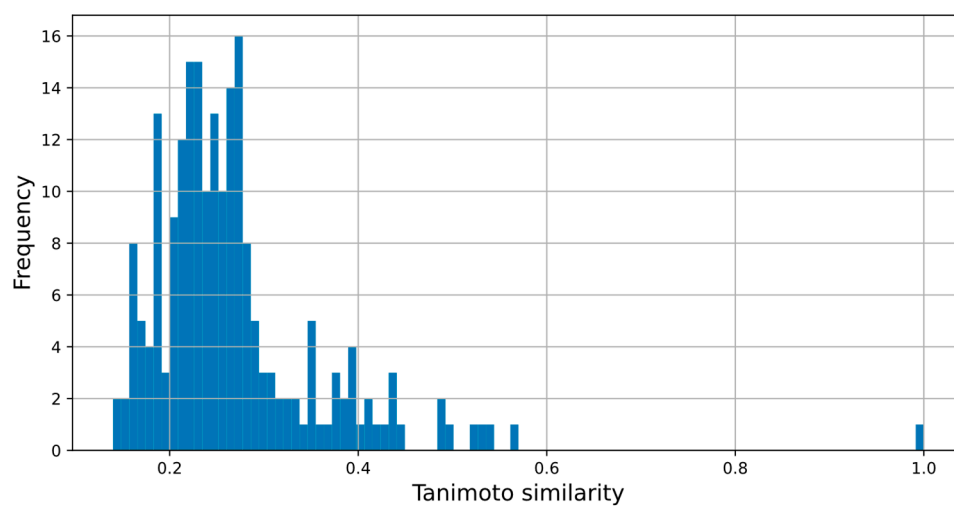

**Figure S22.** The Tanimoto similarity distribution between data after QED, Lipinski's rule of five selections, and initials.

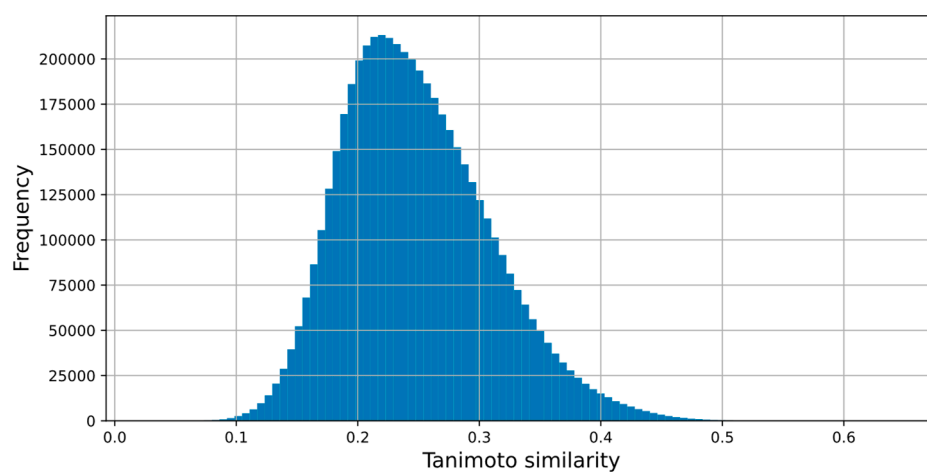

**Figure S23.** The Tanimoto similarity distribution histogram between forty-two structures and training data.
