# Supplementary material for: Neural Networks in the Design of Molecules with Affinity to Selected Protein Domains
Source: MDPI journal article supplement (doi:10.3390/ijms24021762), 2023-01-16
Supplement: s1 [file s1]

## Files

|           |                                                     |
|-----------|-----------------------------------------------------|
| File S1.  | ZINC-downloader-2D-smi.wget                         |
| File S2.  | Data_preparation.ipynb                              |
| File S3.  | zinc20_selected_to_create_model_processed.parquet   |
| File S4.  | RORgamma_active_compounds.xlsx                      |
| File S5.  | ROR_gamma_active_QED_Lipinski.ipynb                 |
| File S6.  | ROR_gamma_active_QED_Lipinski.xlsx                  |
| File S7.  | SYBA_class_ROR_gamma_activ_AFTER_QED_LIPINSKI.ipynb |
| File S8.  | Prediction_initializers_ROR_activ.xlsx              |
| File S9.  | SELFIES_coder.py                                    |
| File S10. | UniCode_char.csv                                    |
| File S11. | Molecule_generator-Generative_neural_network.py     |
| File S12. | SELFIES_to_mol_seq.json                             |
| File S13. | mol_seq_to_SELFIES.json                             |
| File S14. | mol_seq_to_int.json                                 |
| File S15. | int_to_mol_seq.json                                 |
| File S16. | mol_seq2lat_ZINC.h5                                 |
| File S17. | lat2state_ZINC.h5                                   |
| File S18. | samplemodel_ZINC.h5                                 |
| File S19. | Prediction_1_0.1_tensor_scaling.ipynb               |
| File S20. | Prediction_2_0.2_tensor_scaling.ipynb               |
| File S21. | Molecules_generated_tensor_scaling_0_1.xlsx         |
| File S22. | Molecules_generated_tensor_scaling_0_2.xlsx         |
| File S23. | Selection_from_0_1_tensor_scaling.ipynb             |
| File S24. | Selection_from_0_2_tensor_scaling.ipynb             |
| File S25. | Selected_molecules_from_0_1_tensor_scaling.xlsx     |
| File S26. | Selected_molecules_from_0_2_tensor_scaling.xlsx     |
| File S27. | Combine_Generated_and_Selected_structures.ipynb     |
| File S28. | Assigning_prediction_mode_to_selected_SMILES.ipynb  |
| File S29. | All_generated_SMILES_QED_Lipinski.xlsx              |

|           |                                                      |
|-----------|------------------------------------------------------|
| File S30. | SYBA_classifier_additional_filter.ipynb              |
| File S31. | All_generated_SMILES_SYBA_filtration.xlsx            |
| File S32. | All_generated_SMILES_visualization.ipynb             |
| File S33. | Python_molecular_docking.py                          |
| File S34. | Tanimoto_similarity-SYBA_selection.ipynb             |
| File S35. | Tanimoto_similarity_All_generated_and_selected.ipynb |
| File S36. | Checking_if_ROR_gamma_activ_are_in_ZINC_db.ipynb     |
| File S37. | dockingResults_ROR_gamma_SYBA_selected.xlsx          |
| File S38. | Clean_results.ipynb                                  |
| File S39. | Selection_of_most_prominent_structures.ipynb         |
| File S40. | SMILES_to_3D_PDB.ipynb                               |
| File S41. | My_score_to_final_structures.ipynb                   |
| File S42. | dockingResults_ROR_gamma_SYBA_CLEAN.xlsx             |
| File S43. | Reference_dockings folder                            |
| File S44. | 7npc_structure_of_native_ligand.dlg                  |
| File S45. | 7NP5_structure_of_native_ligand.dlg                  |
| File S46. | 7KXD_structure_of_native_ligand.dlg                  |
| File S47. | master_thesis_calculations.xlsx                      |
